# Supplementary material for: Re-evaluating 14 C dating accuracy in deep-sea sediment archives
Source: Copernicus journal article supplement (doi:10.5194/gchron-2019-10), 2019-09-16
Supplement: Supplementary file 1 [file gchron-2019-10-supplement.pdf]

Constant SAR of 5 cm ka<sup>-1</sup> with:  
constant BD of 10 cm, constant abundance of 100% and 0% broken foraminifera

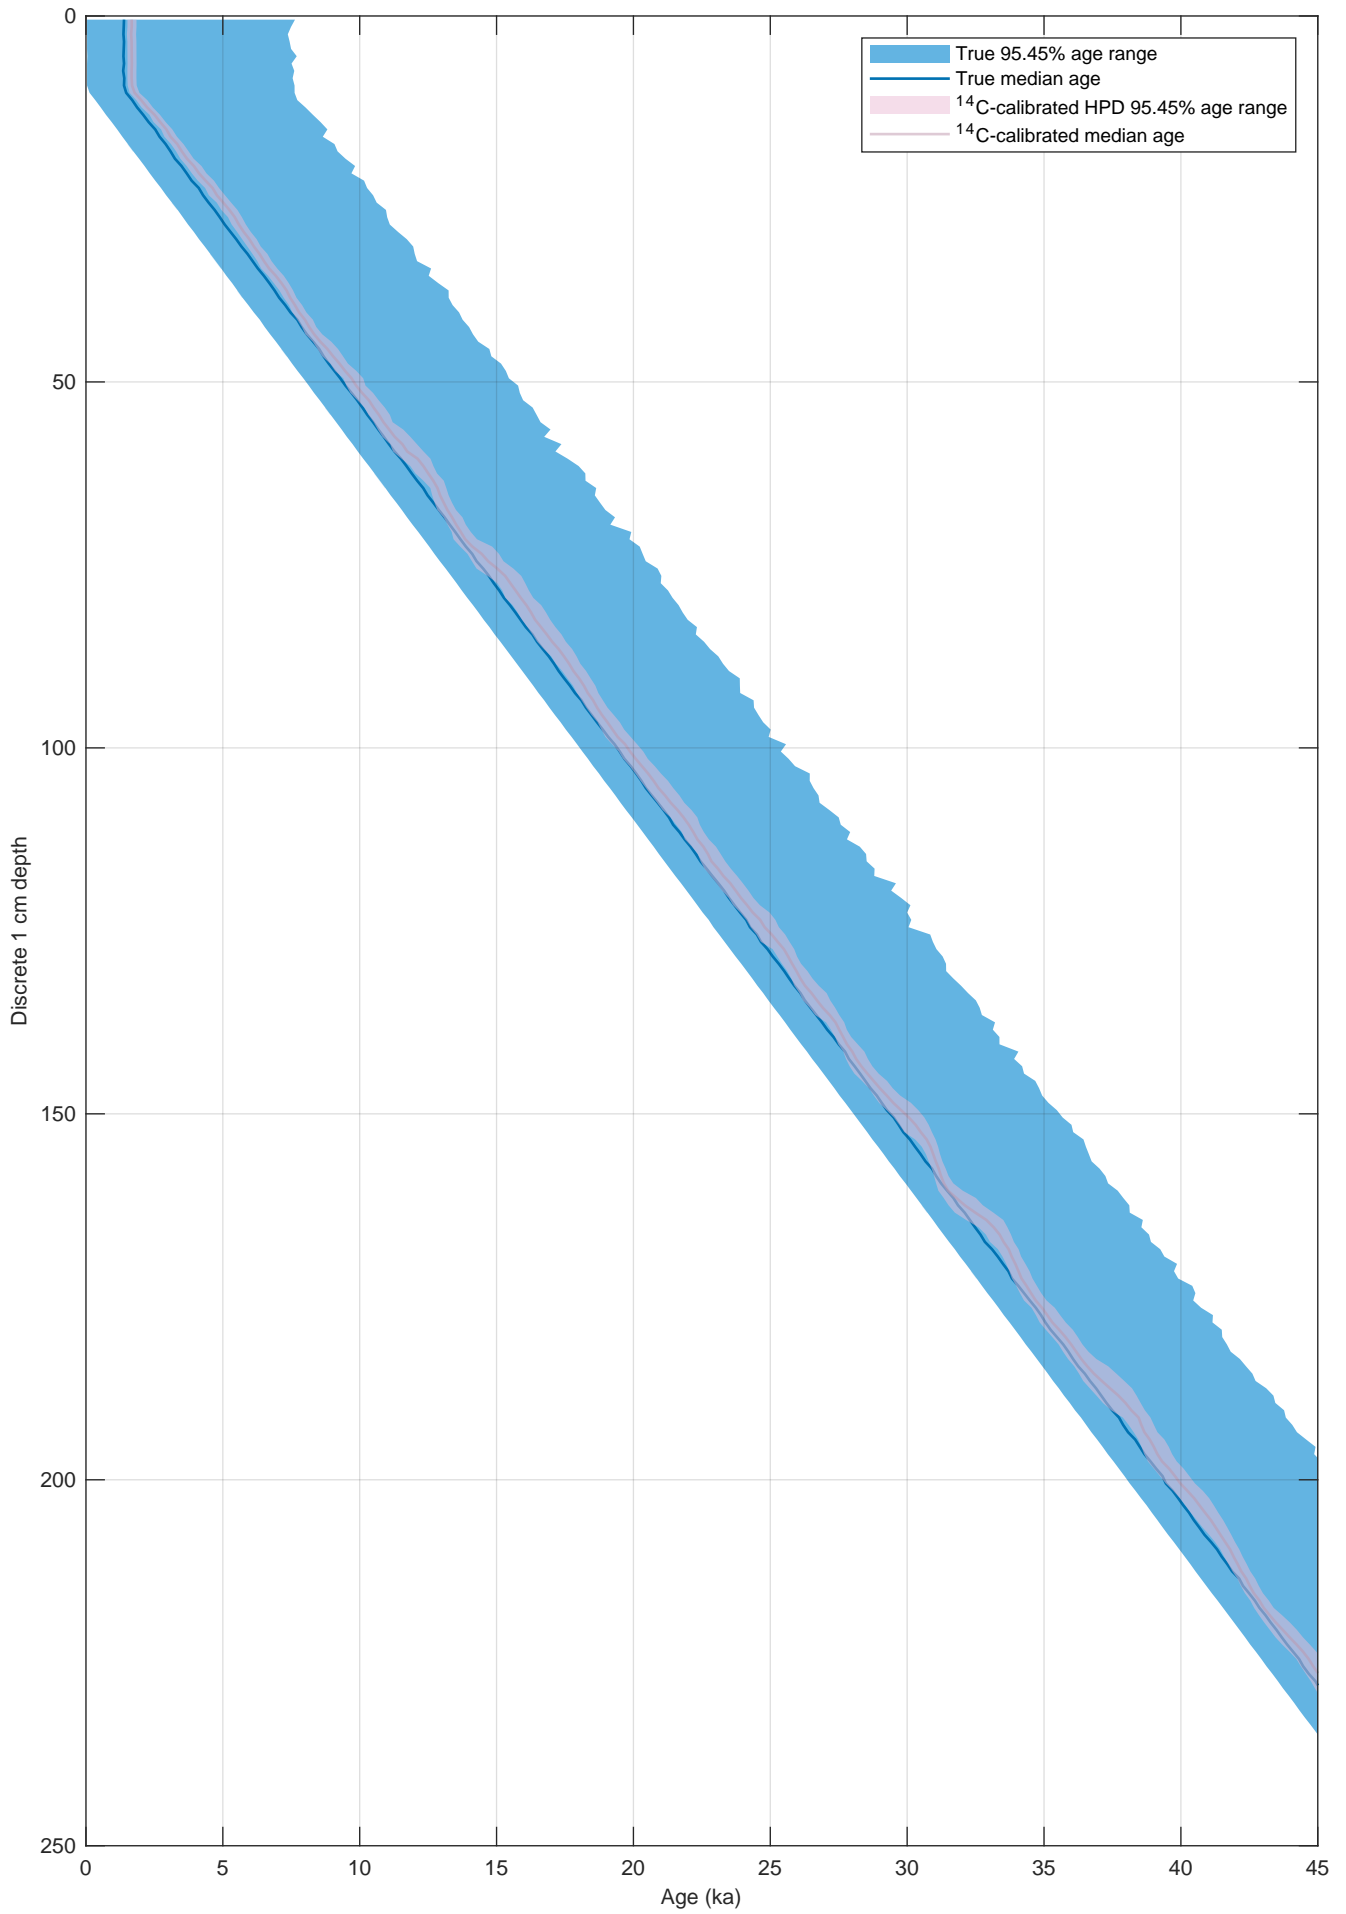

**Figure S1.** Simulated 1 cm discrete-depth 95.45% true age range (light blue), true median age (dark blue), <sup>14</sup>C-calibrated 95.45% HPD age range (light pink) and <sup>14</sup>C-calibrated median age (dark pink for whole foraminifera in a simulation scenario with a constant SAR of 5 cm ka<sup>-1</sup>, constant BD of 10 cm and 0% broken foraminifera.

Constant SAR of 10 cm ka<sup>-1</sup> with:  
constant BD of 10 cm, constant abundance of 100% and 0% broken foraminifera

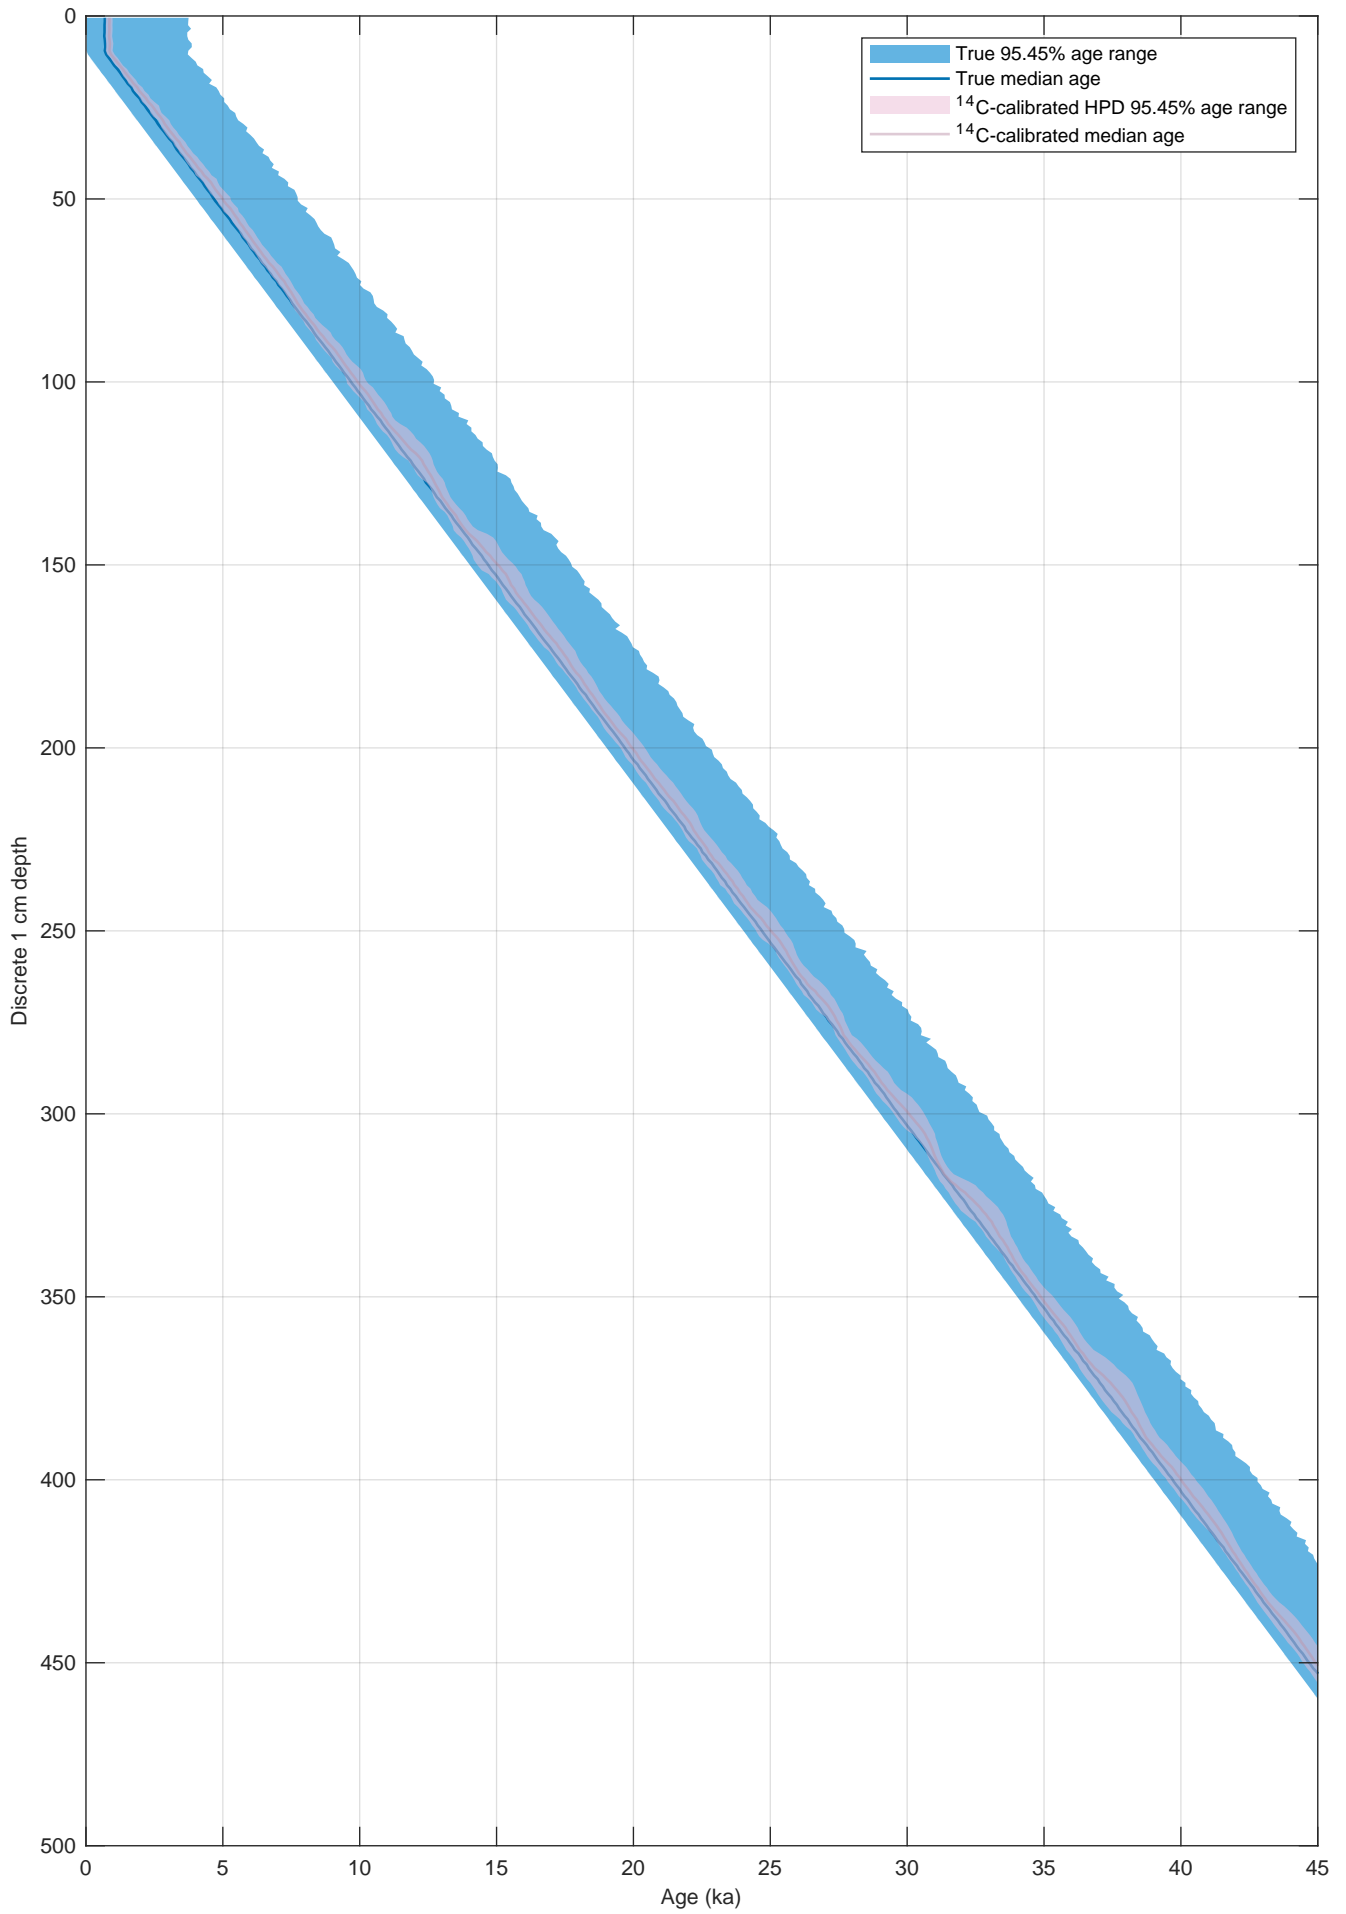

**Figure S2.** Simulated 1 cm discrete-depth 95.45% true age range (light blue), true median age (dark blue),  $^{14}\text{C}$ -calibrated 95.45% HPD age range (light pink) and  $^{14}\text{C}$ -calibrated median age (dark pink for whole foraminifera in a simulation scenario with a constant SAR of 10 cm ka<sup>-1</sup>, constant BD of 10 cm and 0% broken foraminifera.

Constant SAR of 20 cm ka<sup>-1</sup> with:  
constant BD of 10 cm, constant abundance of 100% and 0% broken foraminifera

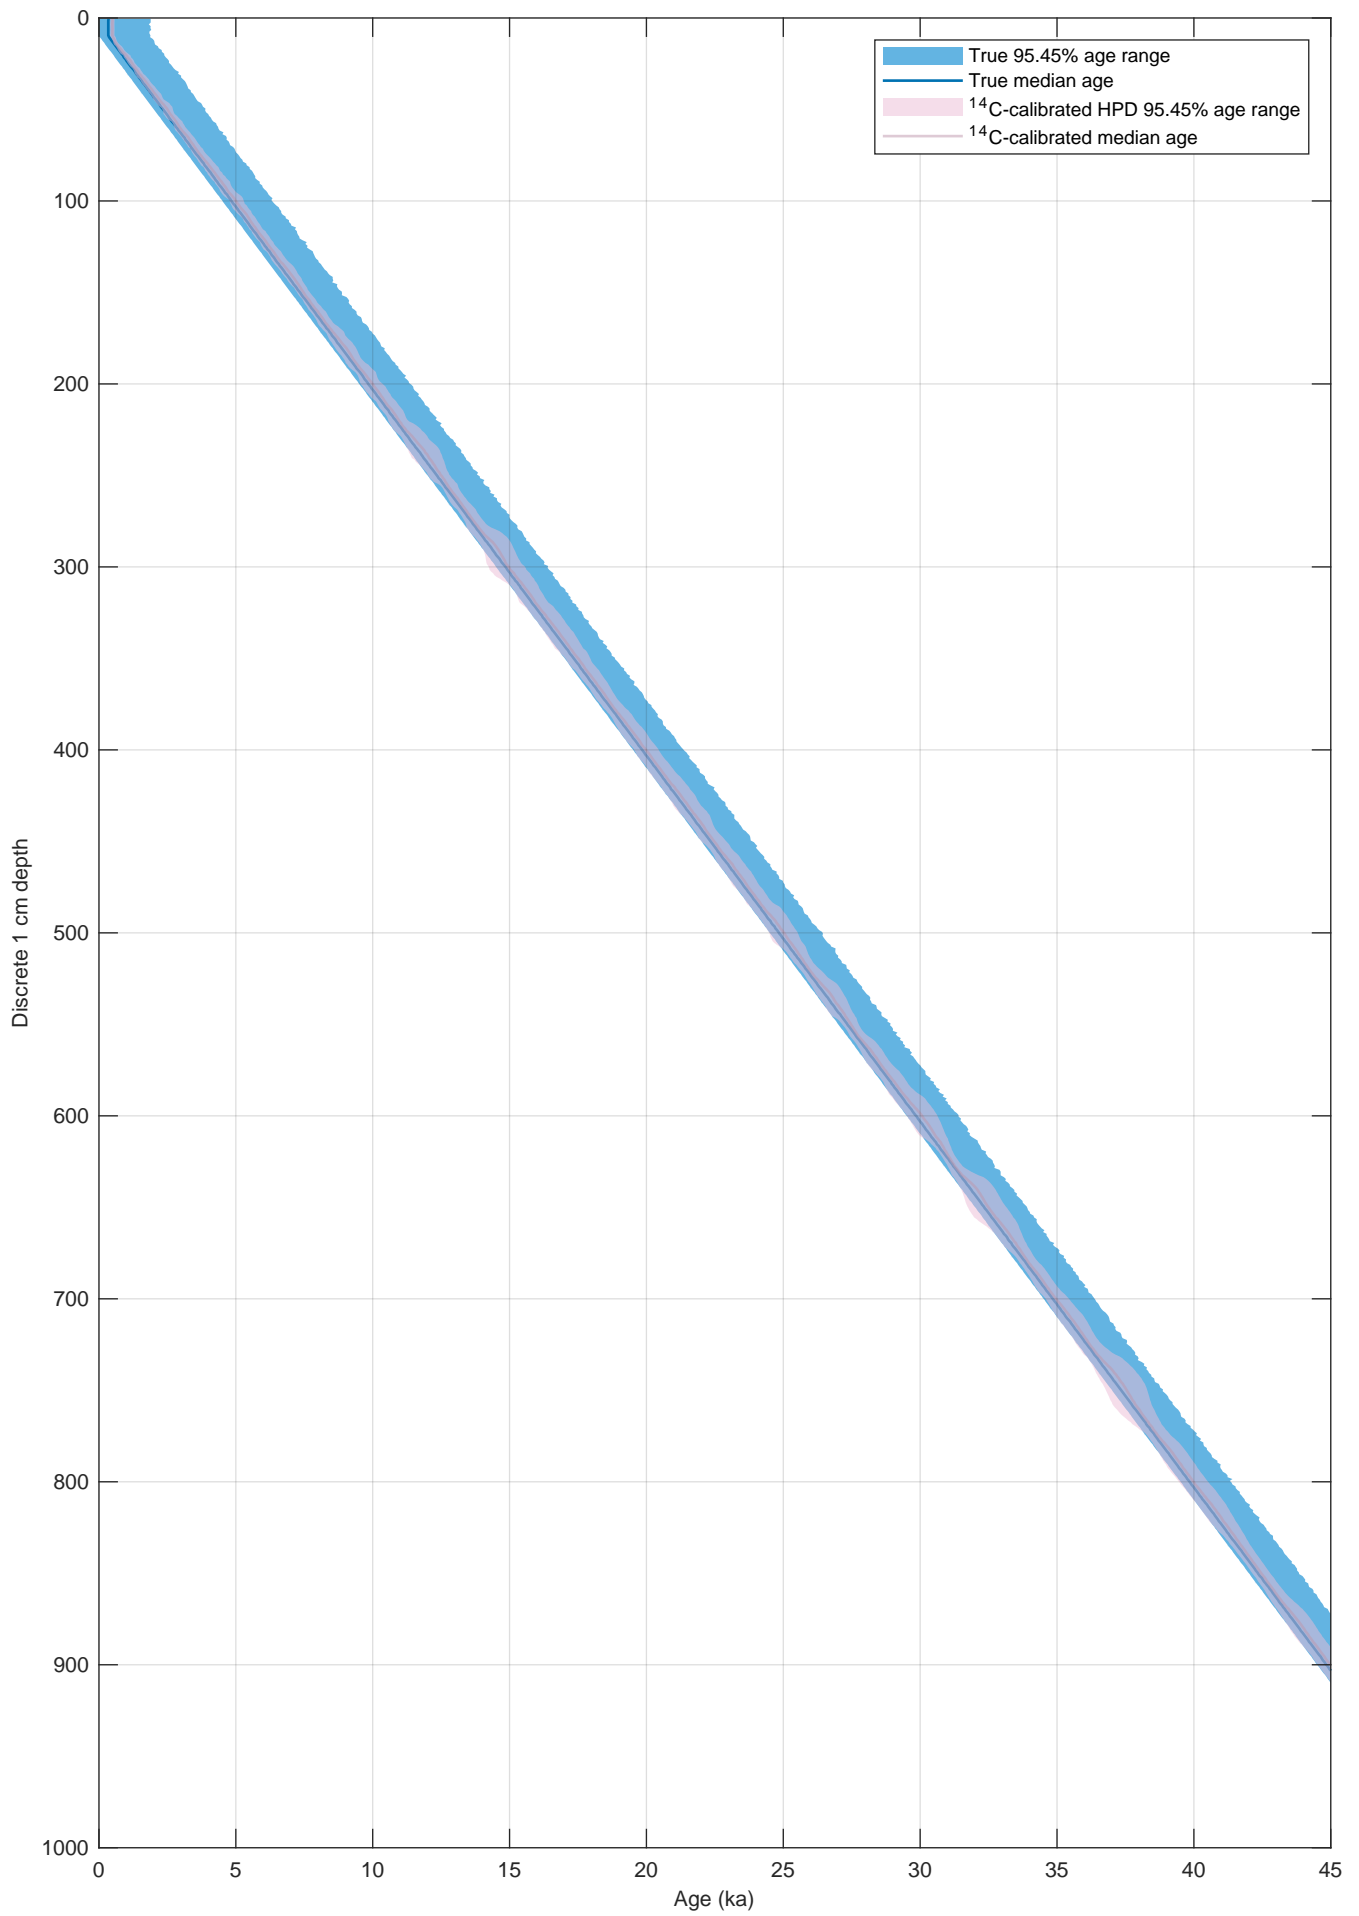

**Figure S3.** Simulated 1 cm discrete-depth 95.45% true age range (light blue), true median age (dark blue), <sup>14</sup>C-calibrated 95.45% HPD age range (light pink) and <sup>14</sup>C-calibrated median age (dark pink for whole foraminifera in a simulation scenario with a constant SAR of 20 cm ka<sup>-1</sup>, constant BD of 10 cm and 0% broken foraminifera.

Constant SAR of 40 cm ka<sup>-1</sup> with:  
constant BD of 10 cm, constant abundance of 100% and 0% broken foraminifera

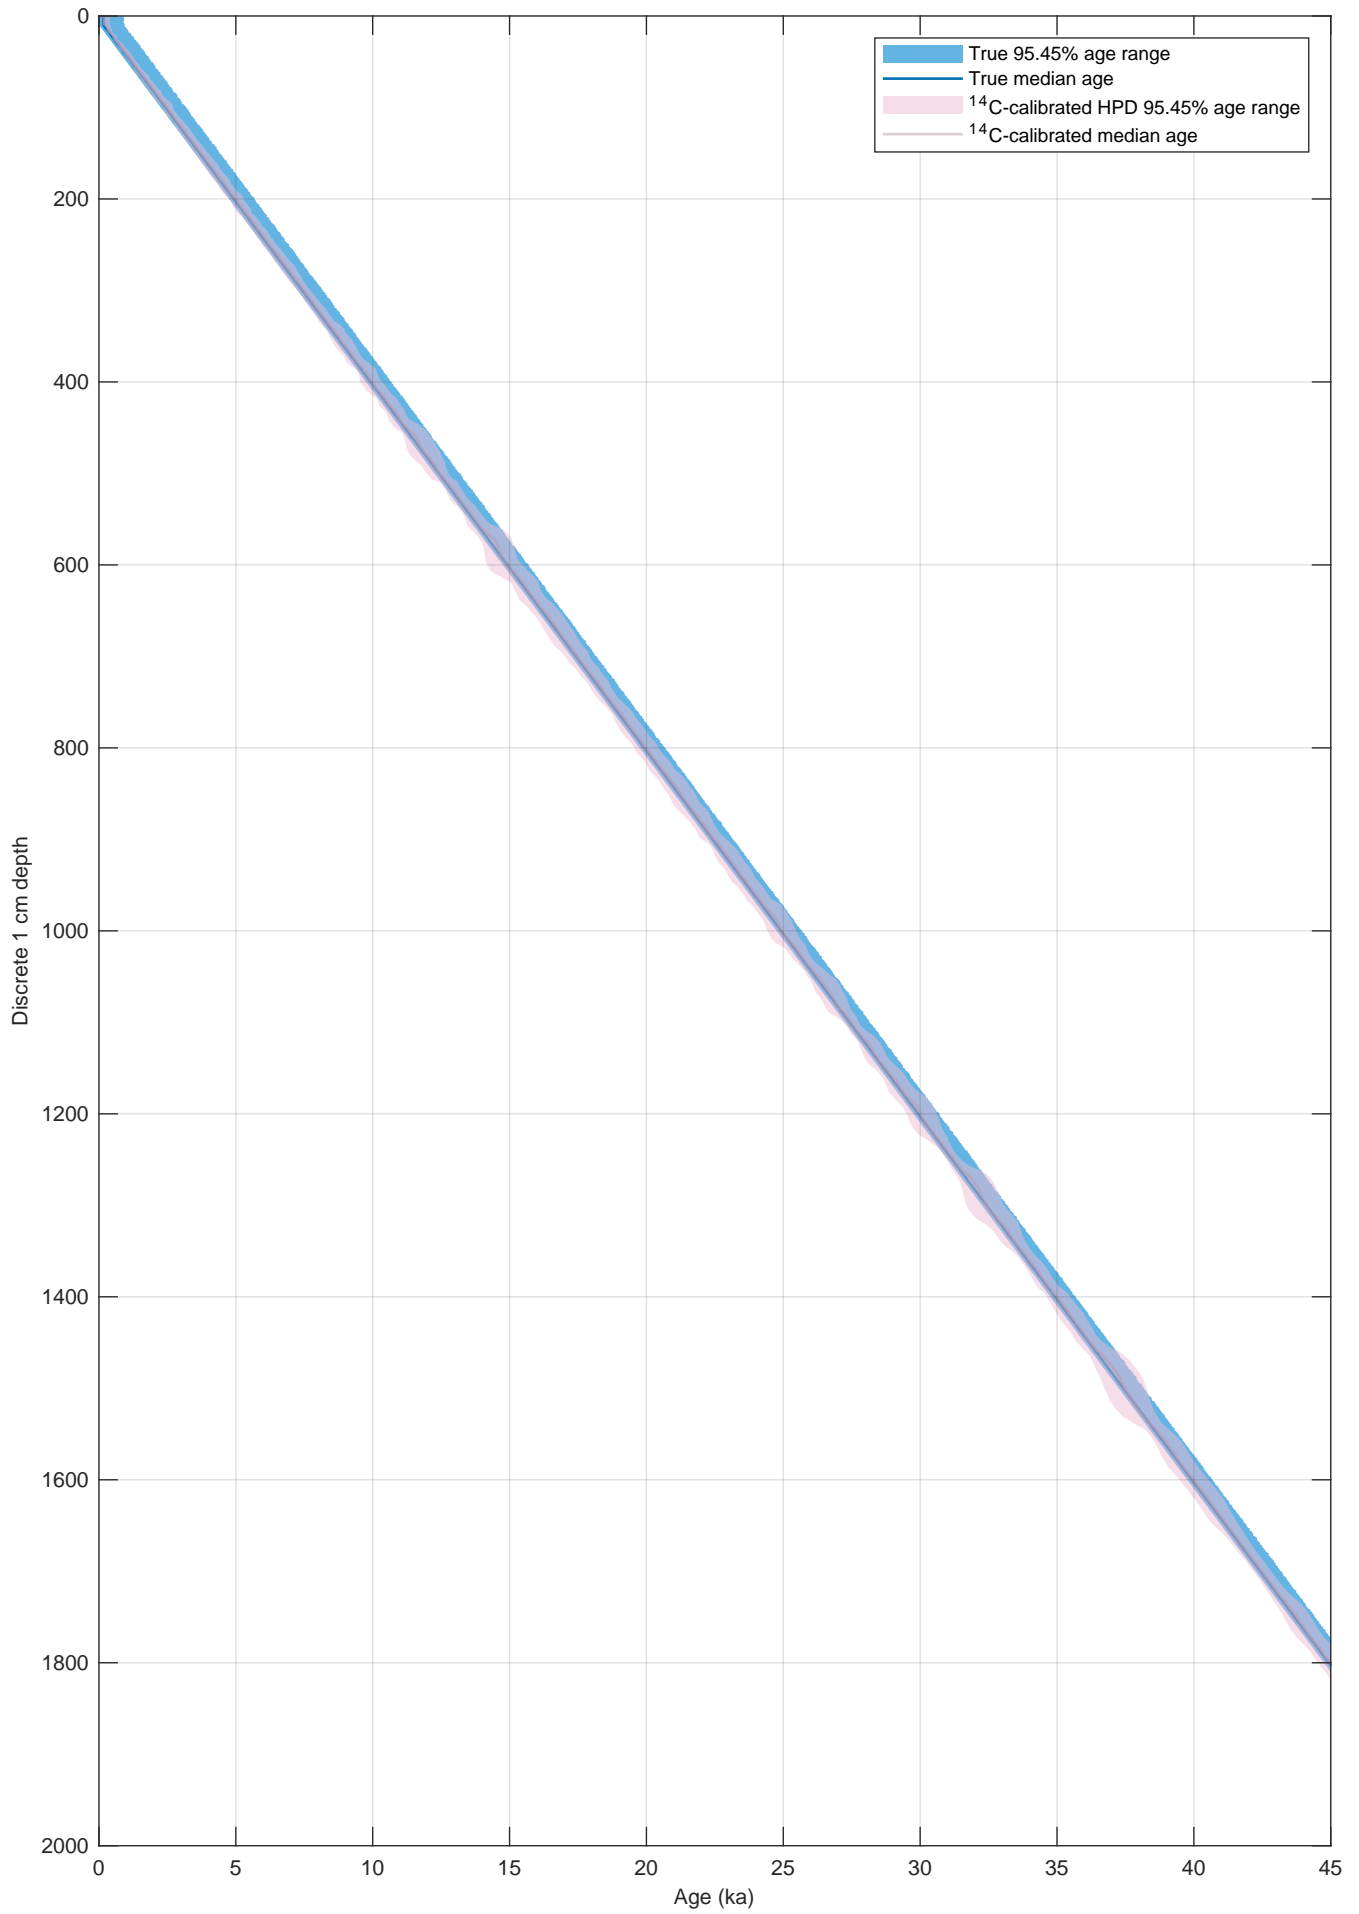

**Figure S4.** Simulated 1 cm discrete-depth 95.45% true age range (light blue), true median age (dark blue), <sup>14</sup>C-calibrated 95.45% HPD age range (light pink) and <sup>14</sup>C-calibrated median age (dark pink for whole foraminifera in a simulation scenario with a constant SAR of 40 cm ka<sup>-1</sup>, constant BD of 10 cm and 0% broken foraminifera.



Constant SAR of 60 cm ka<sup>-1</sup> with:  
constant BD of 10 cm, constant abundance of 100% and 0% broken foraminifera

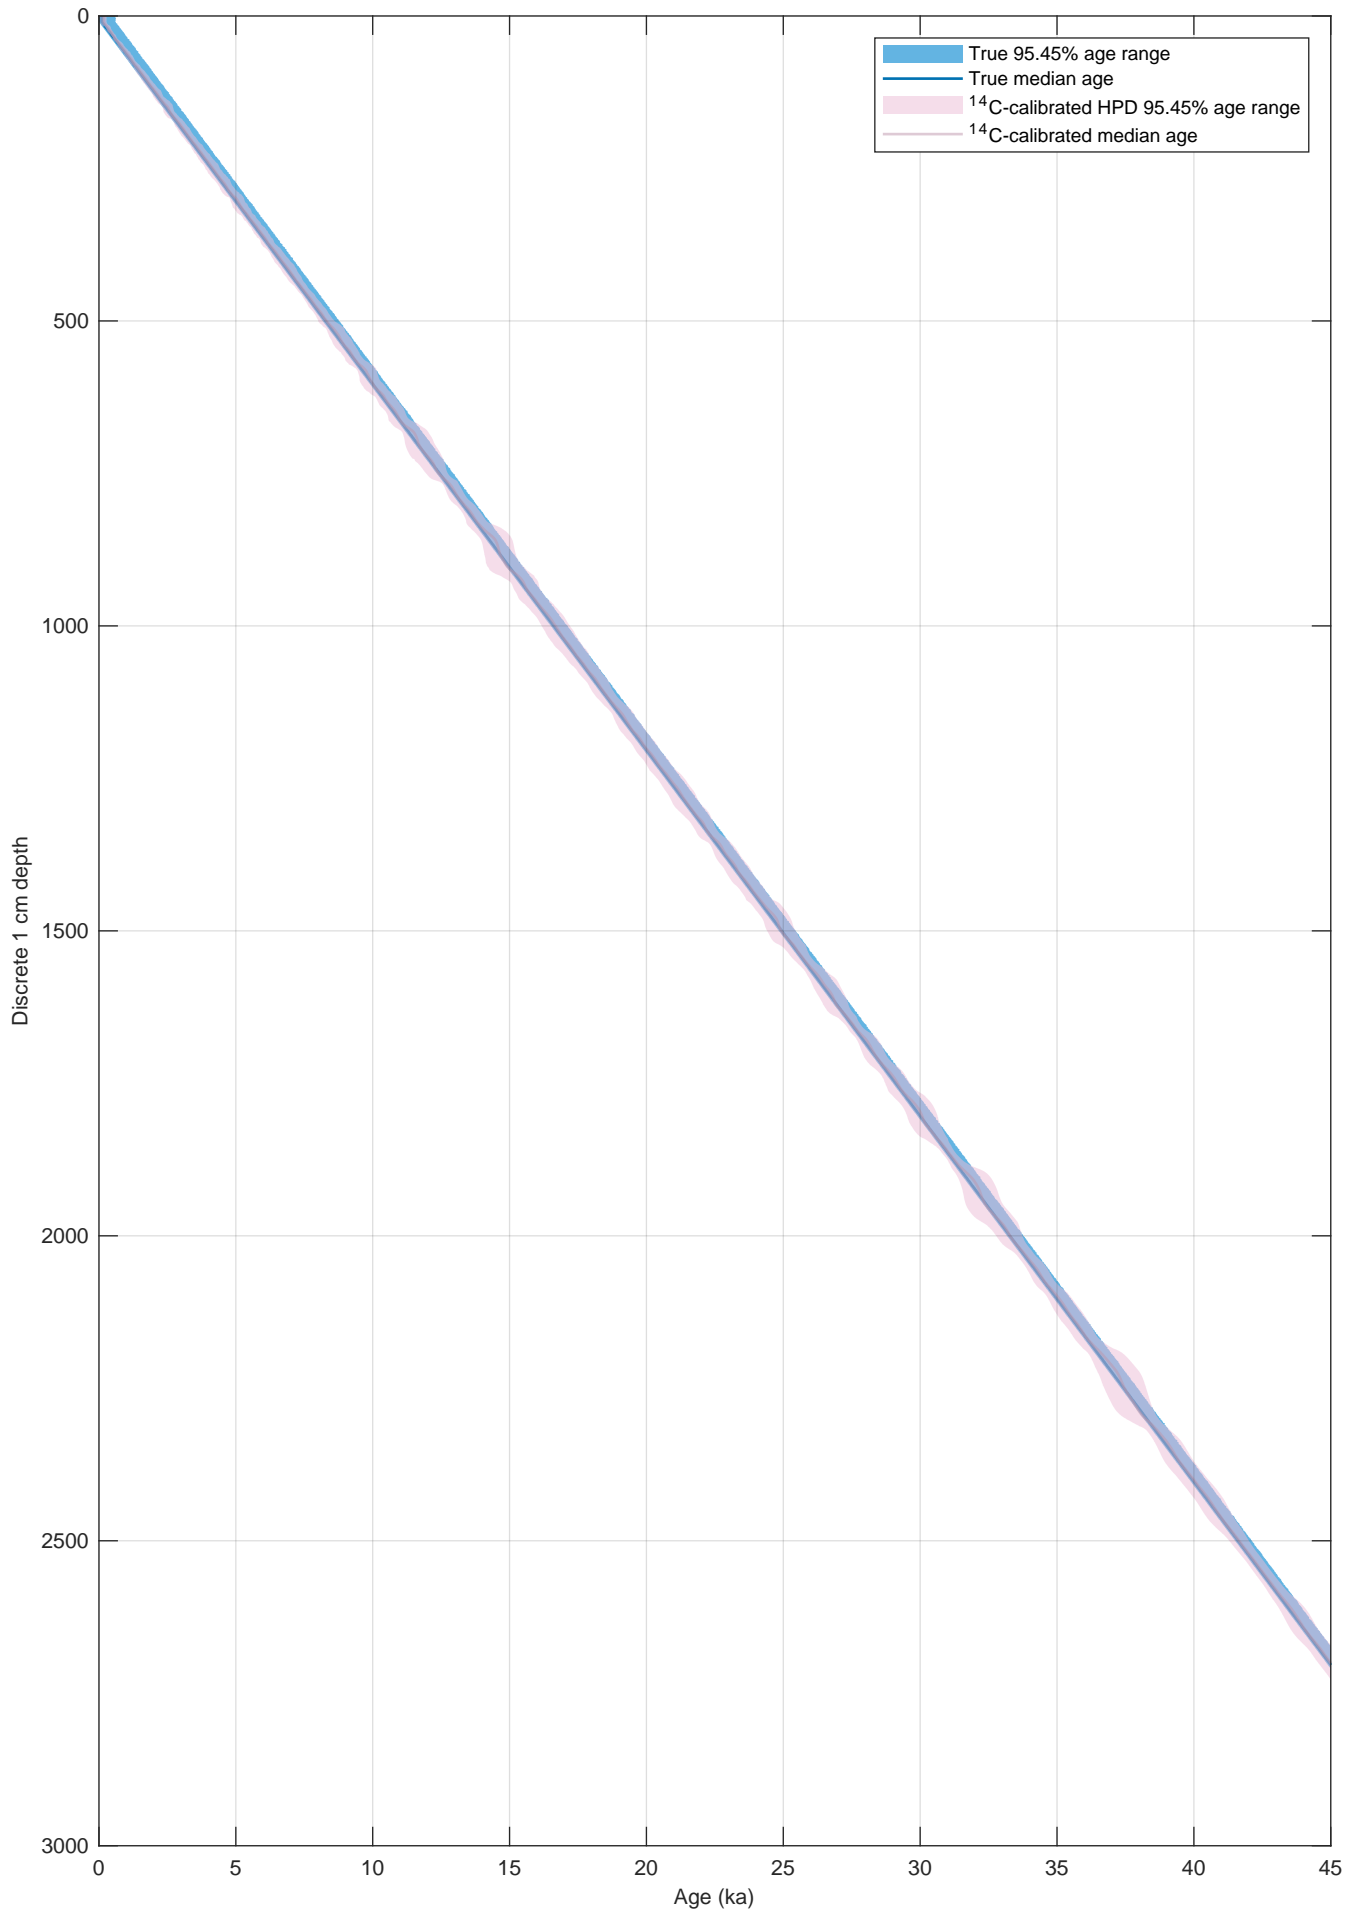

**Figure S5.** Simulated 1 cm discrete-depth 95.45% true age range (light blue), true median age (dark blue), <sup>14</sup>C-calibrated 95.45% HPD age range (light pink) and <sup>14</sup>C-calibrated median age (dark pink for whole foraminifera in a simulation scenario with a constant SAR of 60 cm ka<sup>-1</sup>, constant BD of 10 cm and 0% broken foraminifera.

Constant SAR of 5 cm ka<sup>-1</sup> with:  
constant BD of 10 cm, constant abundance of 100% and 10% broken foraminifera

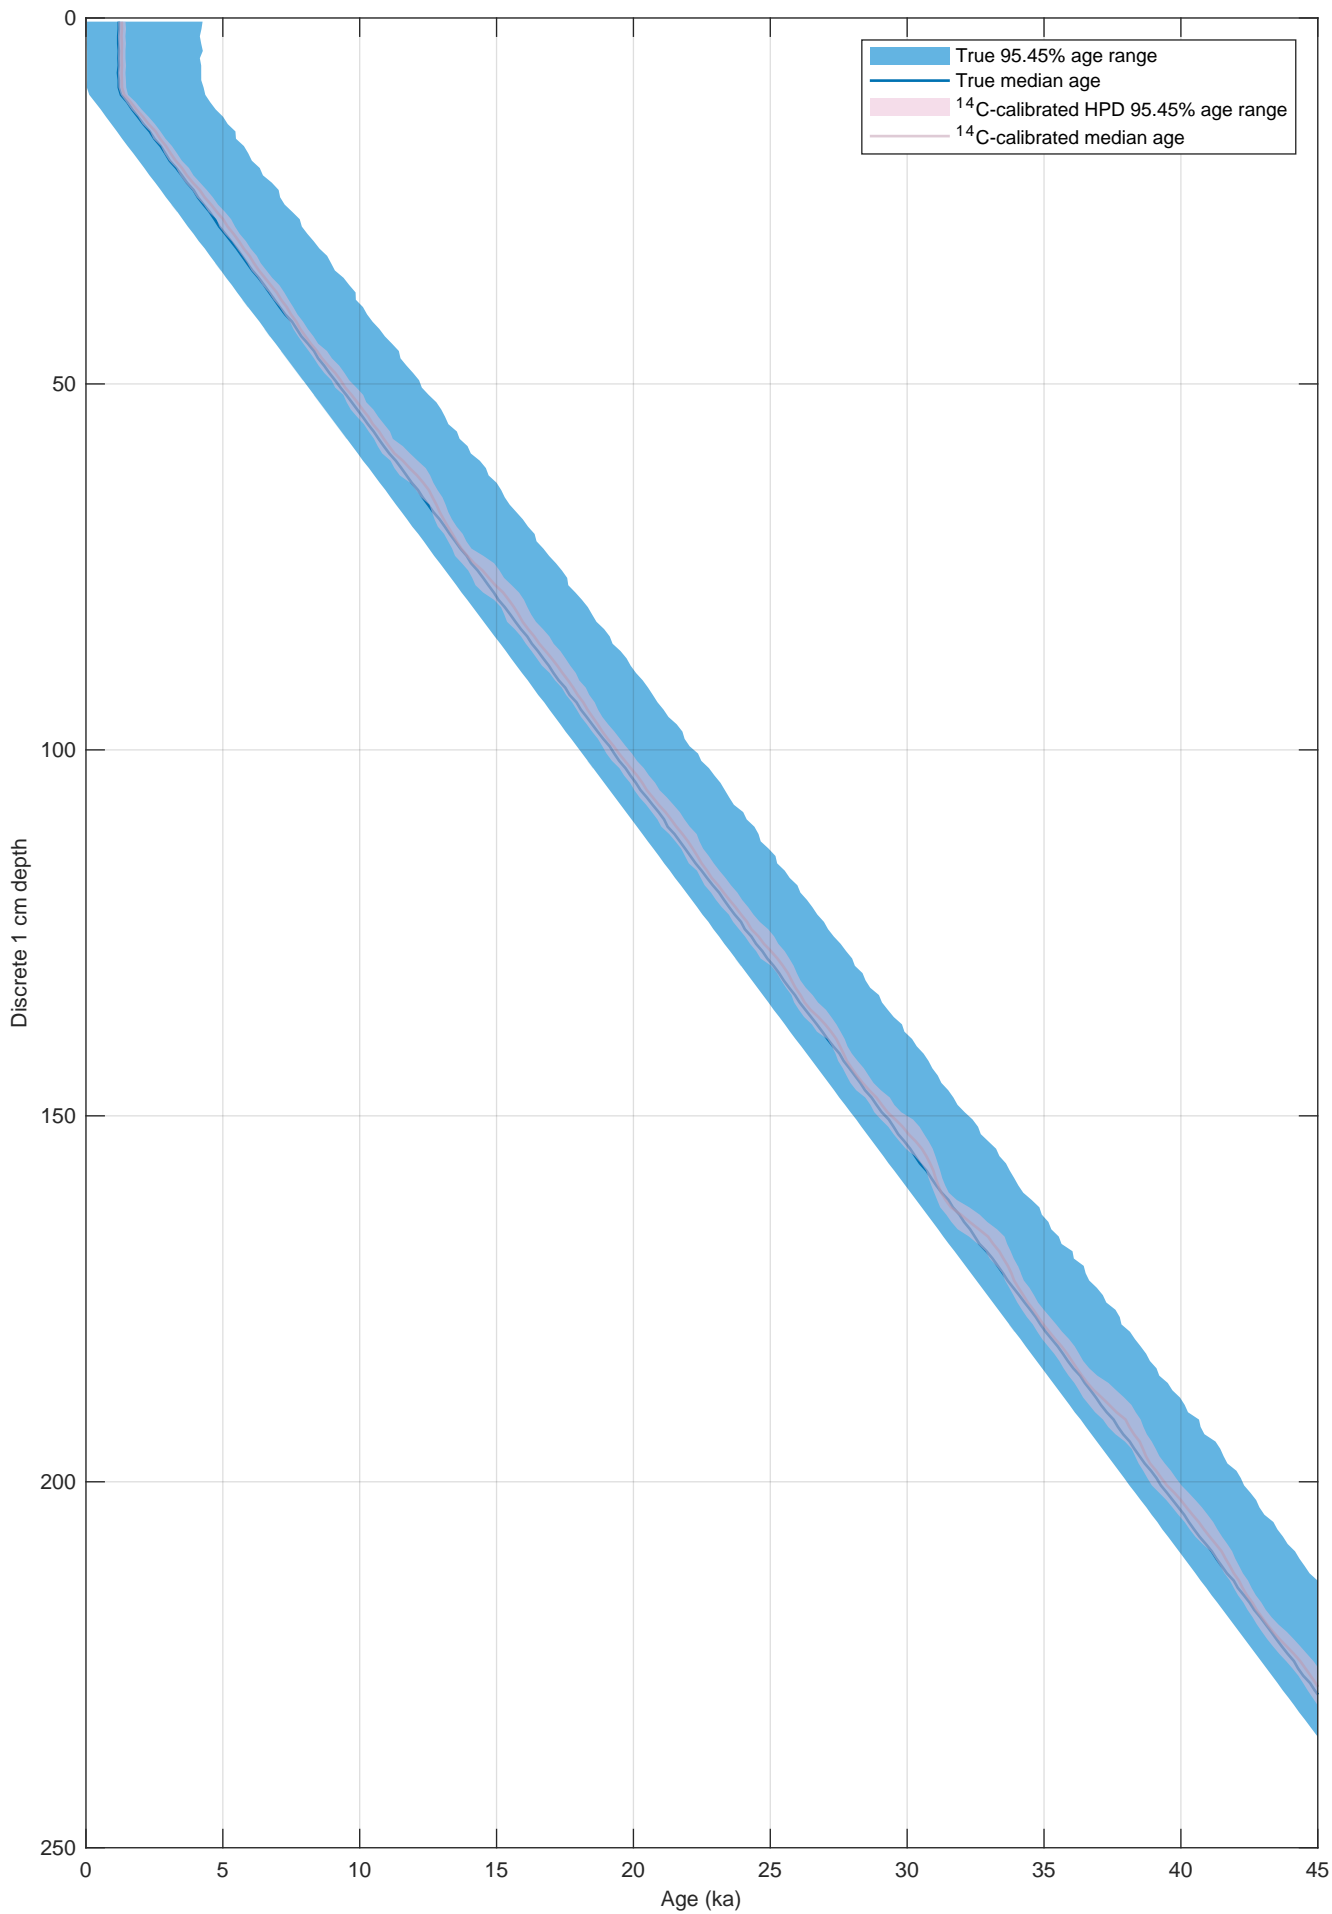

**Figure S6.** Simulated 1 cm discrete-depth 95.45% true age range (light blue), true median age (dark blue),  $^{14}\text{C}$ -calibrated 95.45% HPD age range (light pink) and  $^{14}\text{C}$ -calibrated median age (dark pink for whole foraminifera in a simulation scenario with a constant SAR of 5 cm ka<sup>-1</sup>, constant BD of 10 cm and 10% broken foraminifera.

Constant SAR of 10 cm ka<sup>-1</sup> with:  
constant BD of 10 cm, constant abundance of 100% and 10% broken foraminifera

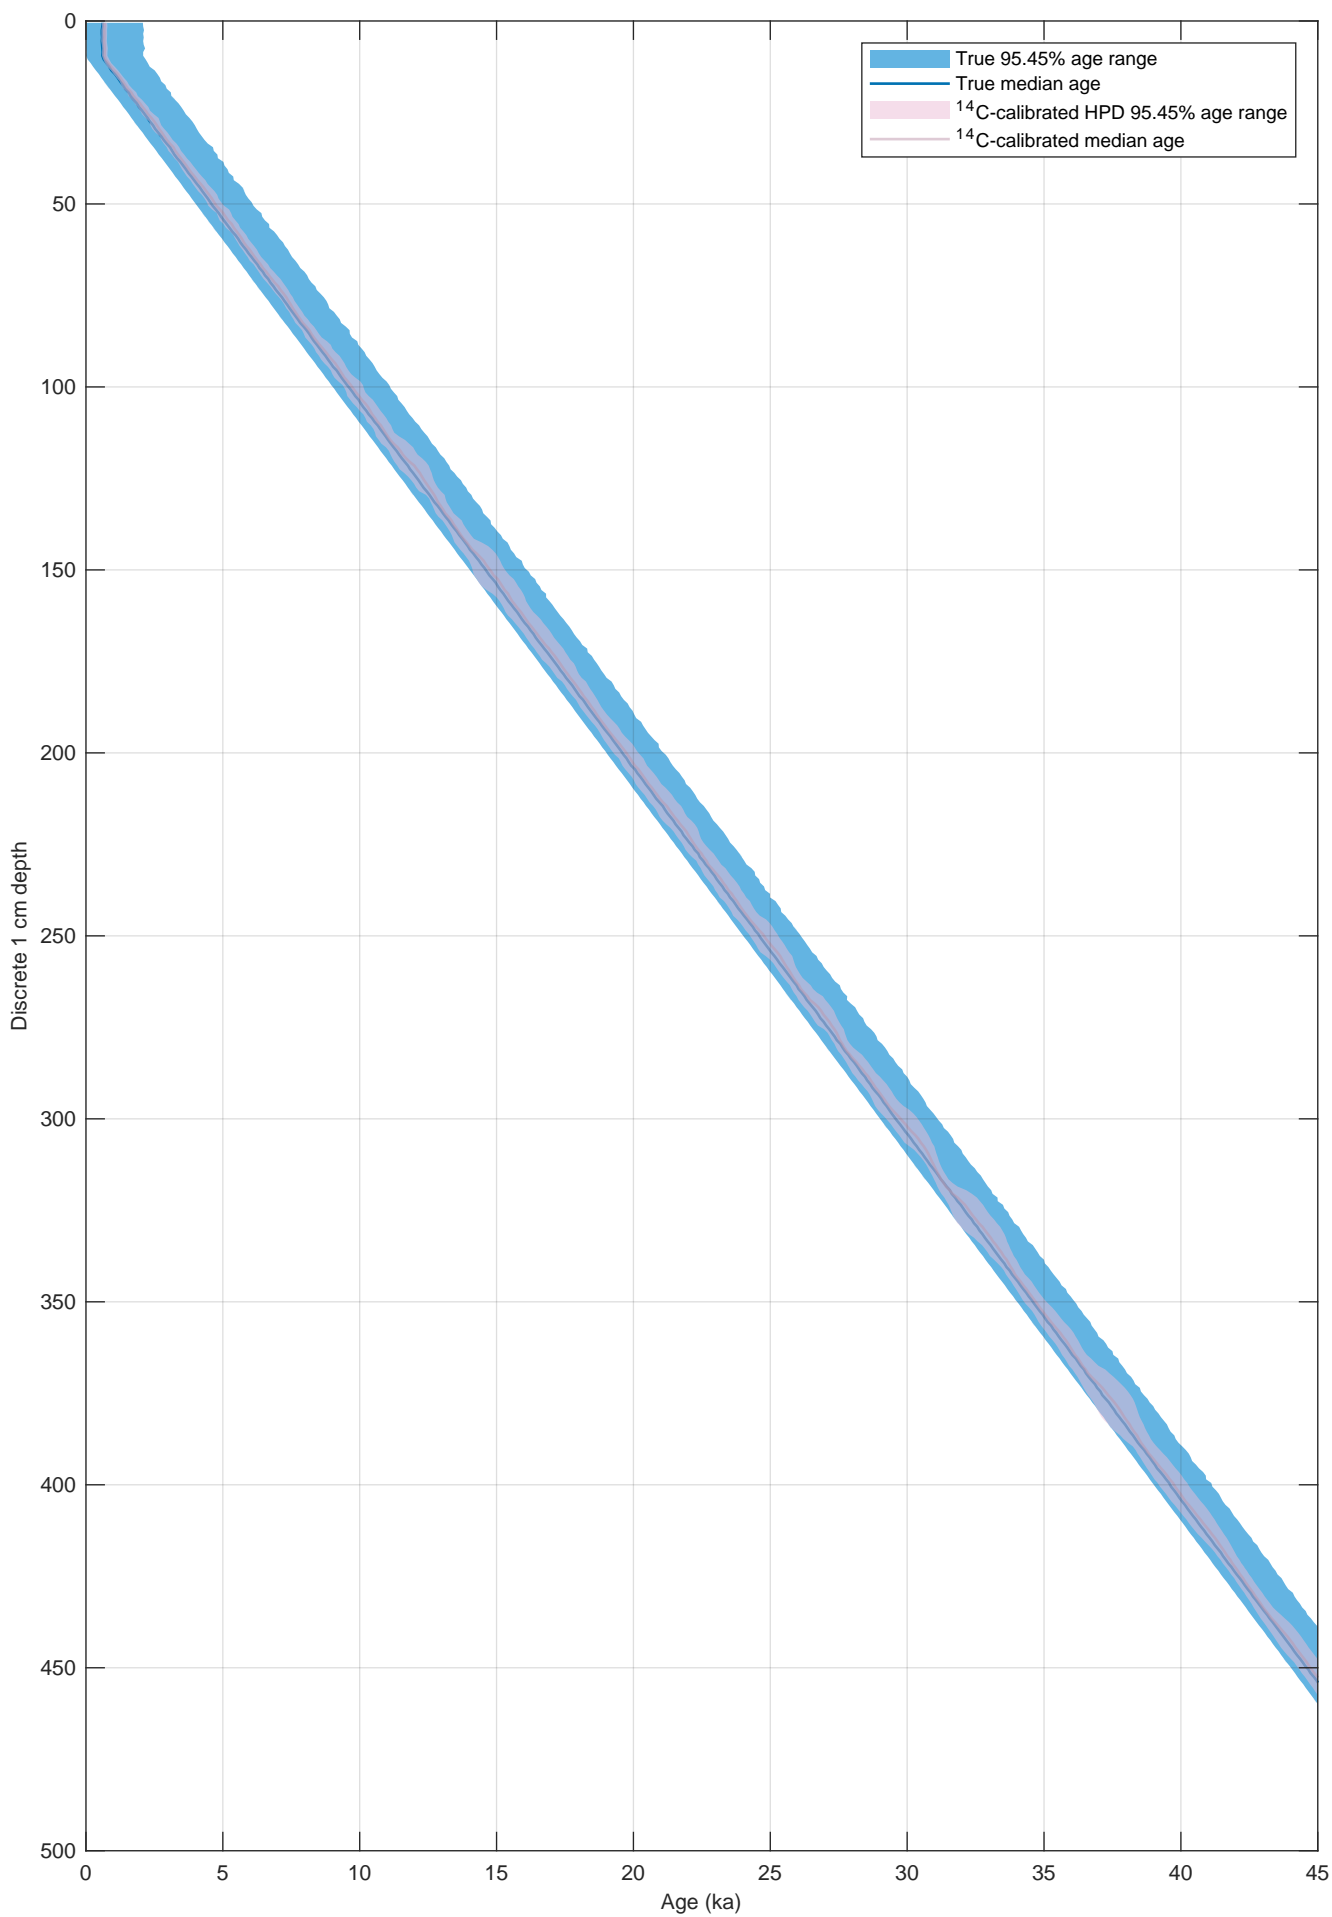

**Figure S7.** Simulated 1 cm discrete-depth 95.45% true age range (light blue), true median age (dark blue),  $^{14}\text{C}$ -calibrated 95.45% HPD age range (light pink) and  $^{14}\text{C}$ -calibrated median age (dark pink for whole foraminifera in a simulation scenario with a constant SAR of 10 cm ka<sup>-1</sup>, constant BD of 10 cm and 10% broken foraminifera.

Constant SAR of 20 cm ka<sup>-1</sup> with:  
constant BD of 10 cm, constant abundance of 100% and 10% broken foraminifera

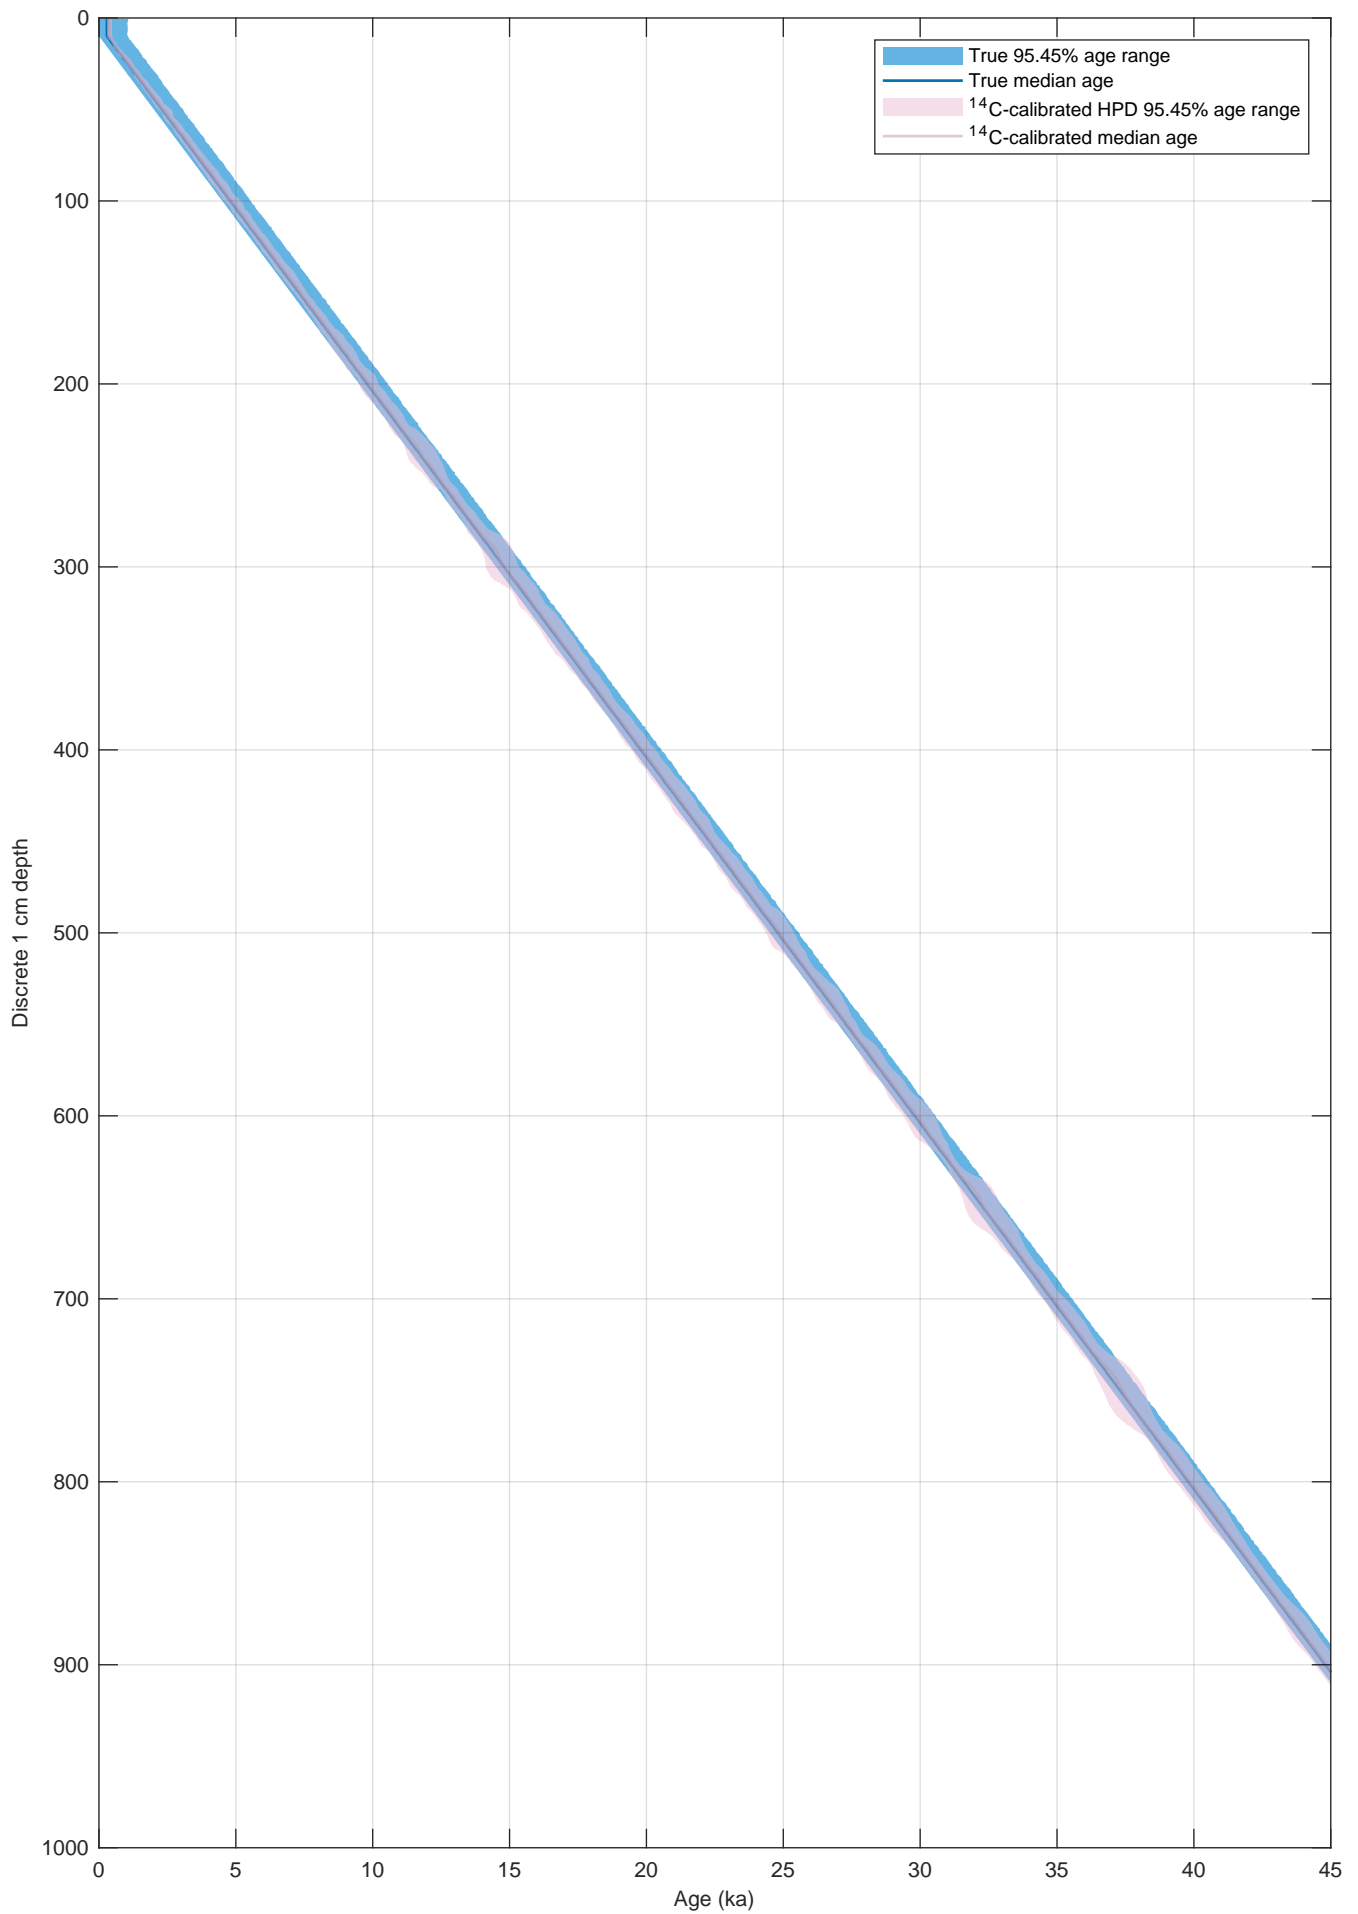

**Figure S8.** Simulated 1 cm discrete-depth 95.45% true age range (light blue), true median age (dark blue),  $^{14}\text{C}$ -calibrated 95.45% HPD age range (light pink) and  $^{14}\text{C}$ -calibrated median age (dark pink for whole foraminifera in a simulation scenario with a constant SAR of 20 cm ka<sup>-1</sup>, constant BD of 10 cm and 10% broken foraminifera.



Constant SAR of 40 cm ka<sup>-1</sup> with:  
constant BD of 10 cm, constant abundance of 100% and 10% broken foraminifera

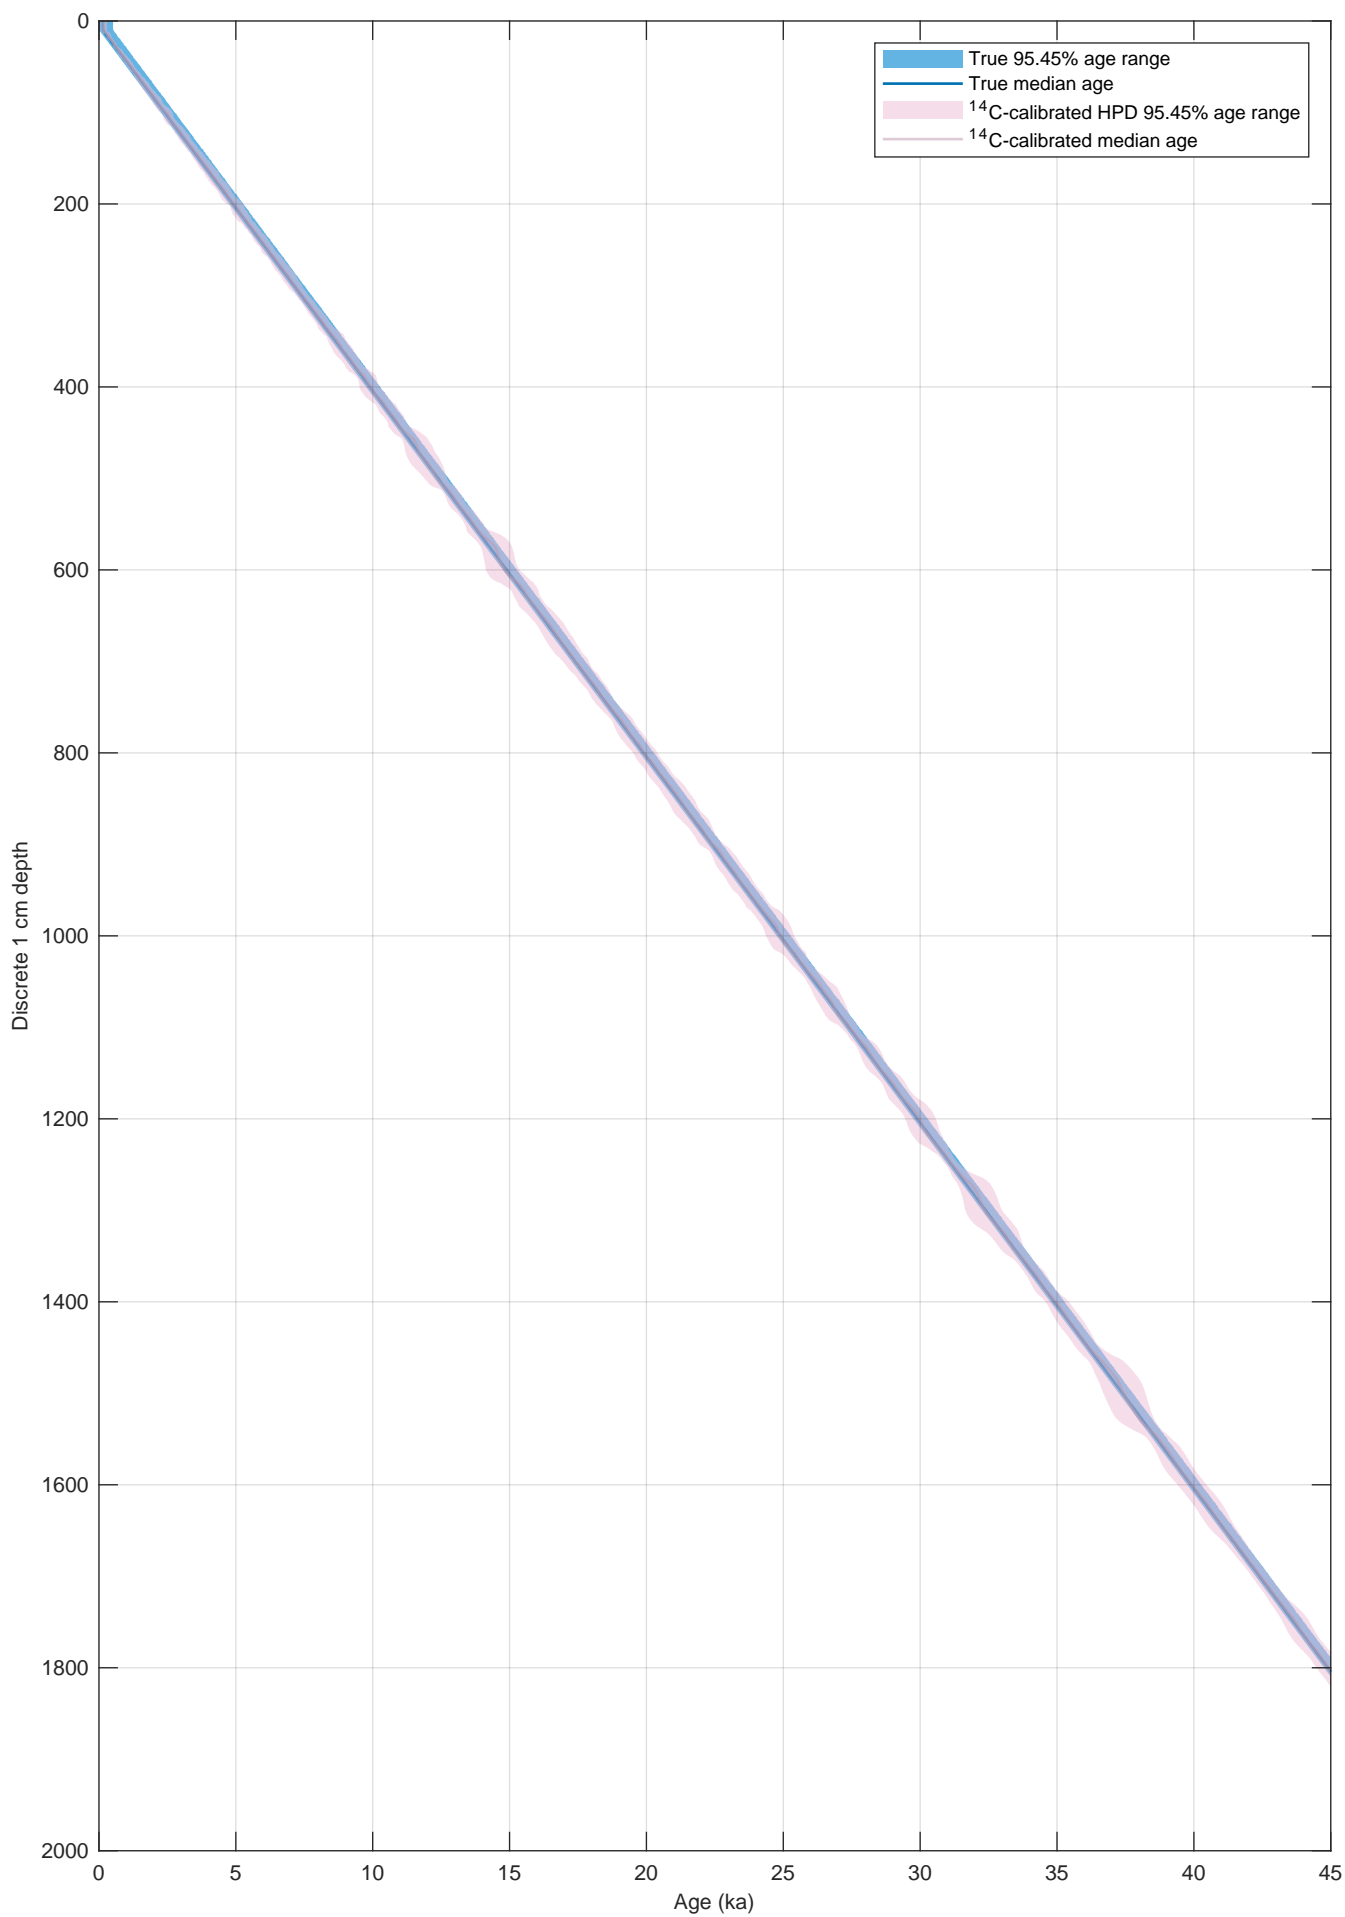

**Figure S9.** Simulated 1 cm discrete-depth 95.45% true age range (light blue), true median age (dark blue), <sup>14</sup>C-calibrated 95.45% HPD age range (light pink) and <sup>14</sup>C-calibrated median age (dark pink for whole foraminifera in a simulation with a constant SAR of 40 cm ka<sup>-1</sup>, constant BD of 10 cm and 10% broken foraminifera.

Constant SAR of 60 cm ka<sup>-1</sup> with:  
constant BD of 10 cm, constant abundance of 100% and 10% broken foraminifera

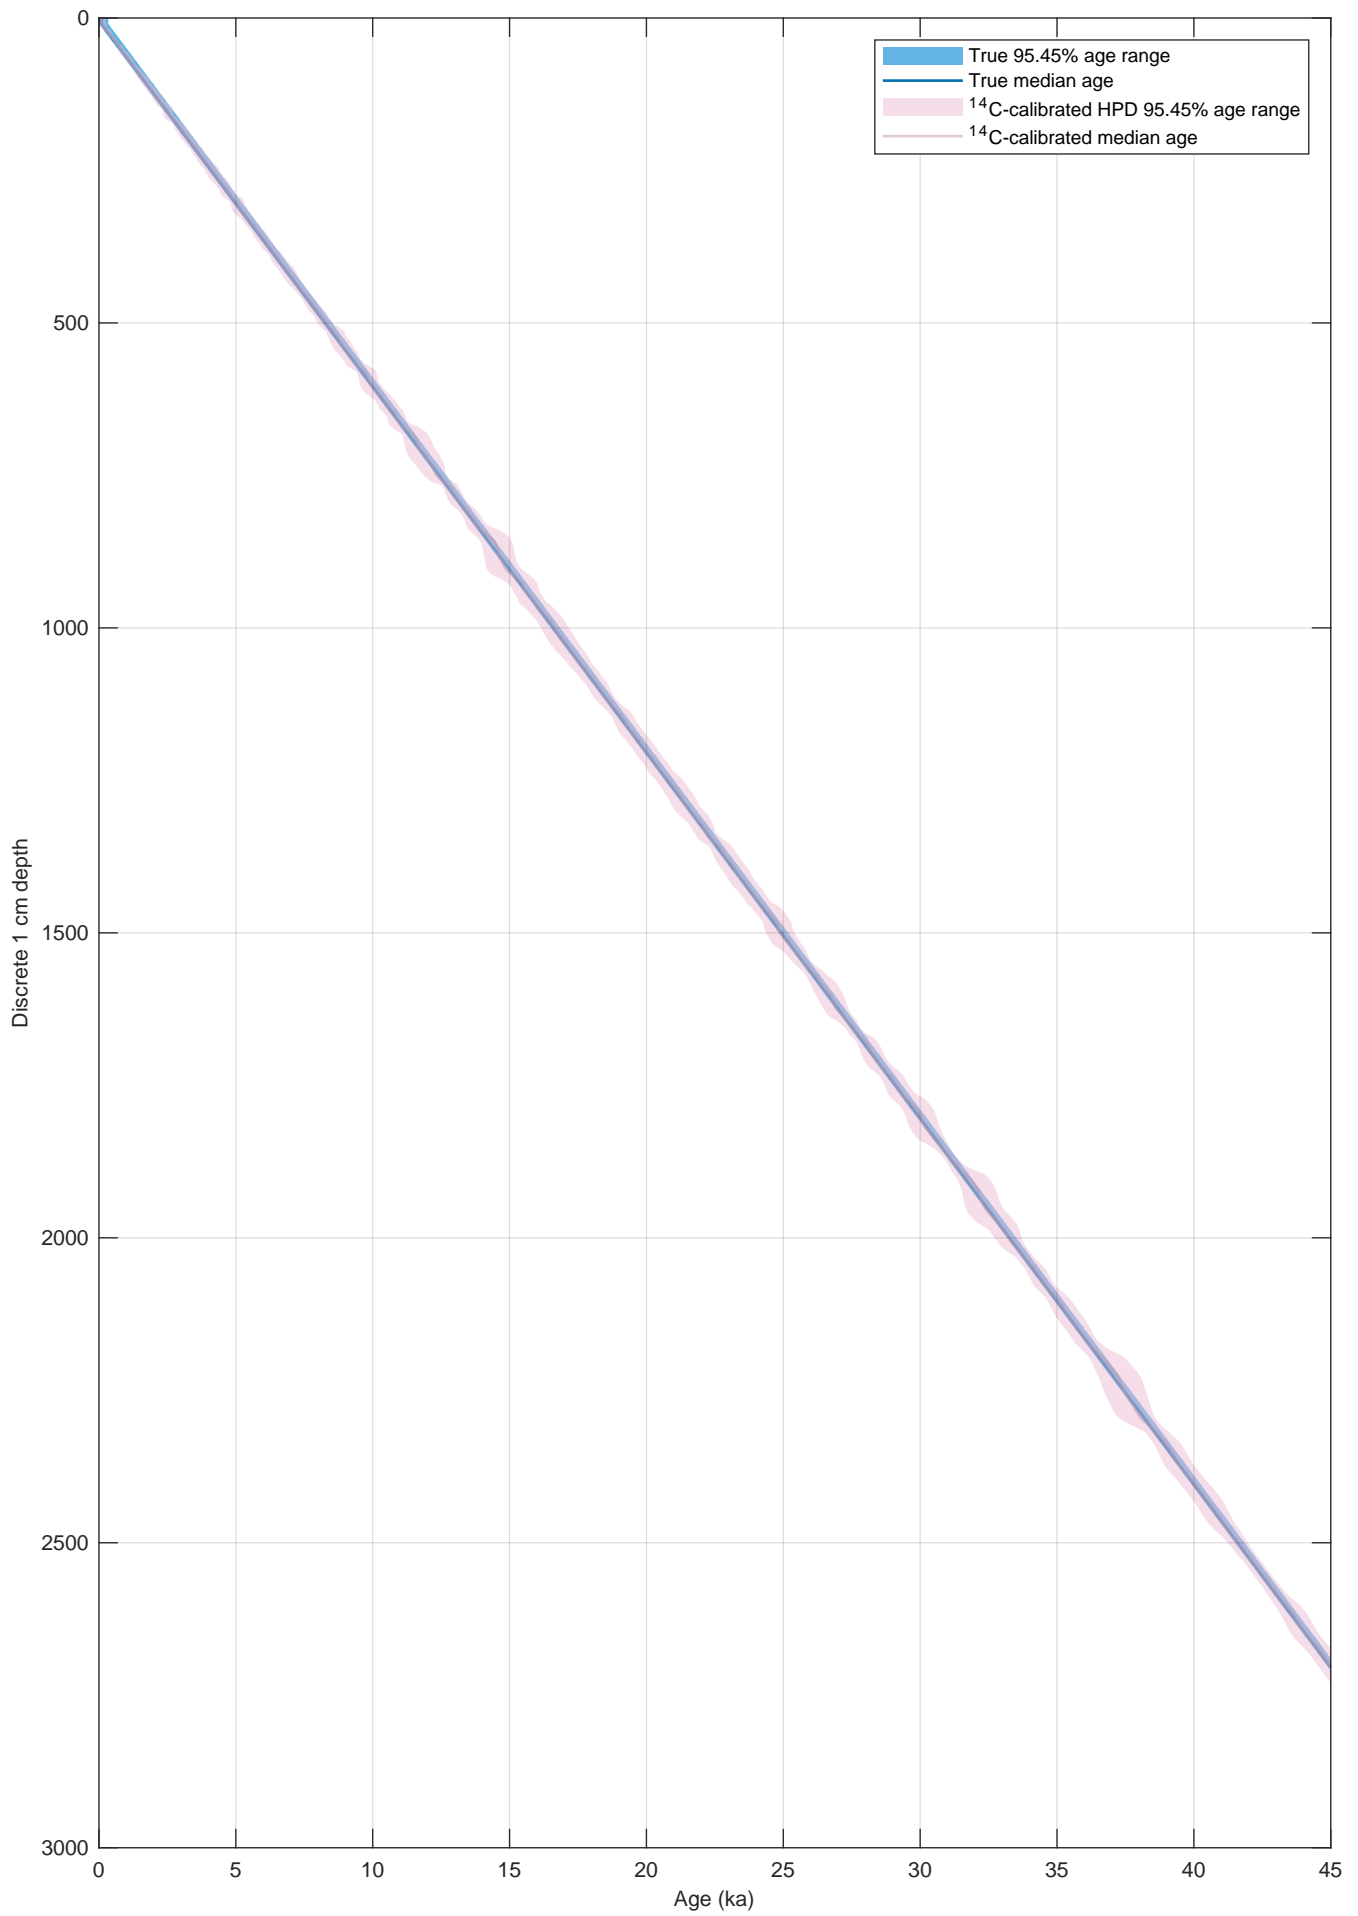

**Figure S10.** Simulated 1 cm discrete-depth 95.45% true age range (light blue), true median age (dark blue),  $^{14}\text{C}$ -calibrated 95.45% HPD age range (light pink) and  $^{14}\text{C}$ -calibrated median age (dark pink for whole foraminifera in a simulation scenario with a constant SAR of 60 cm ka<sup>-1</sup>, constant BD of 10 cm and 10% broken foraminifera.

Simulation output using dynamic input parameters (see Figs. 5a-d) and 10% broken foraminifera

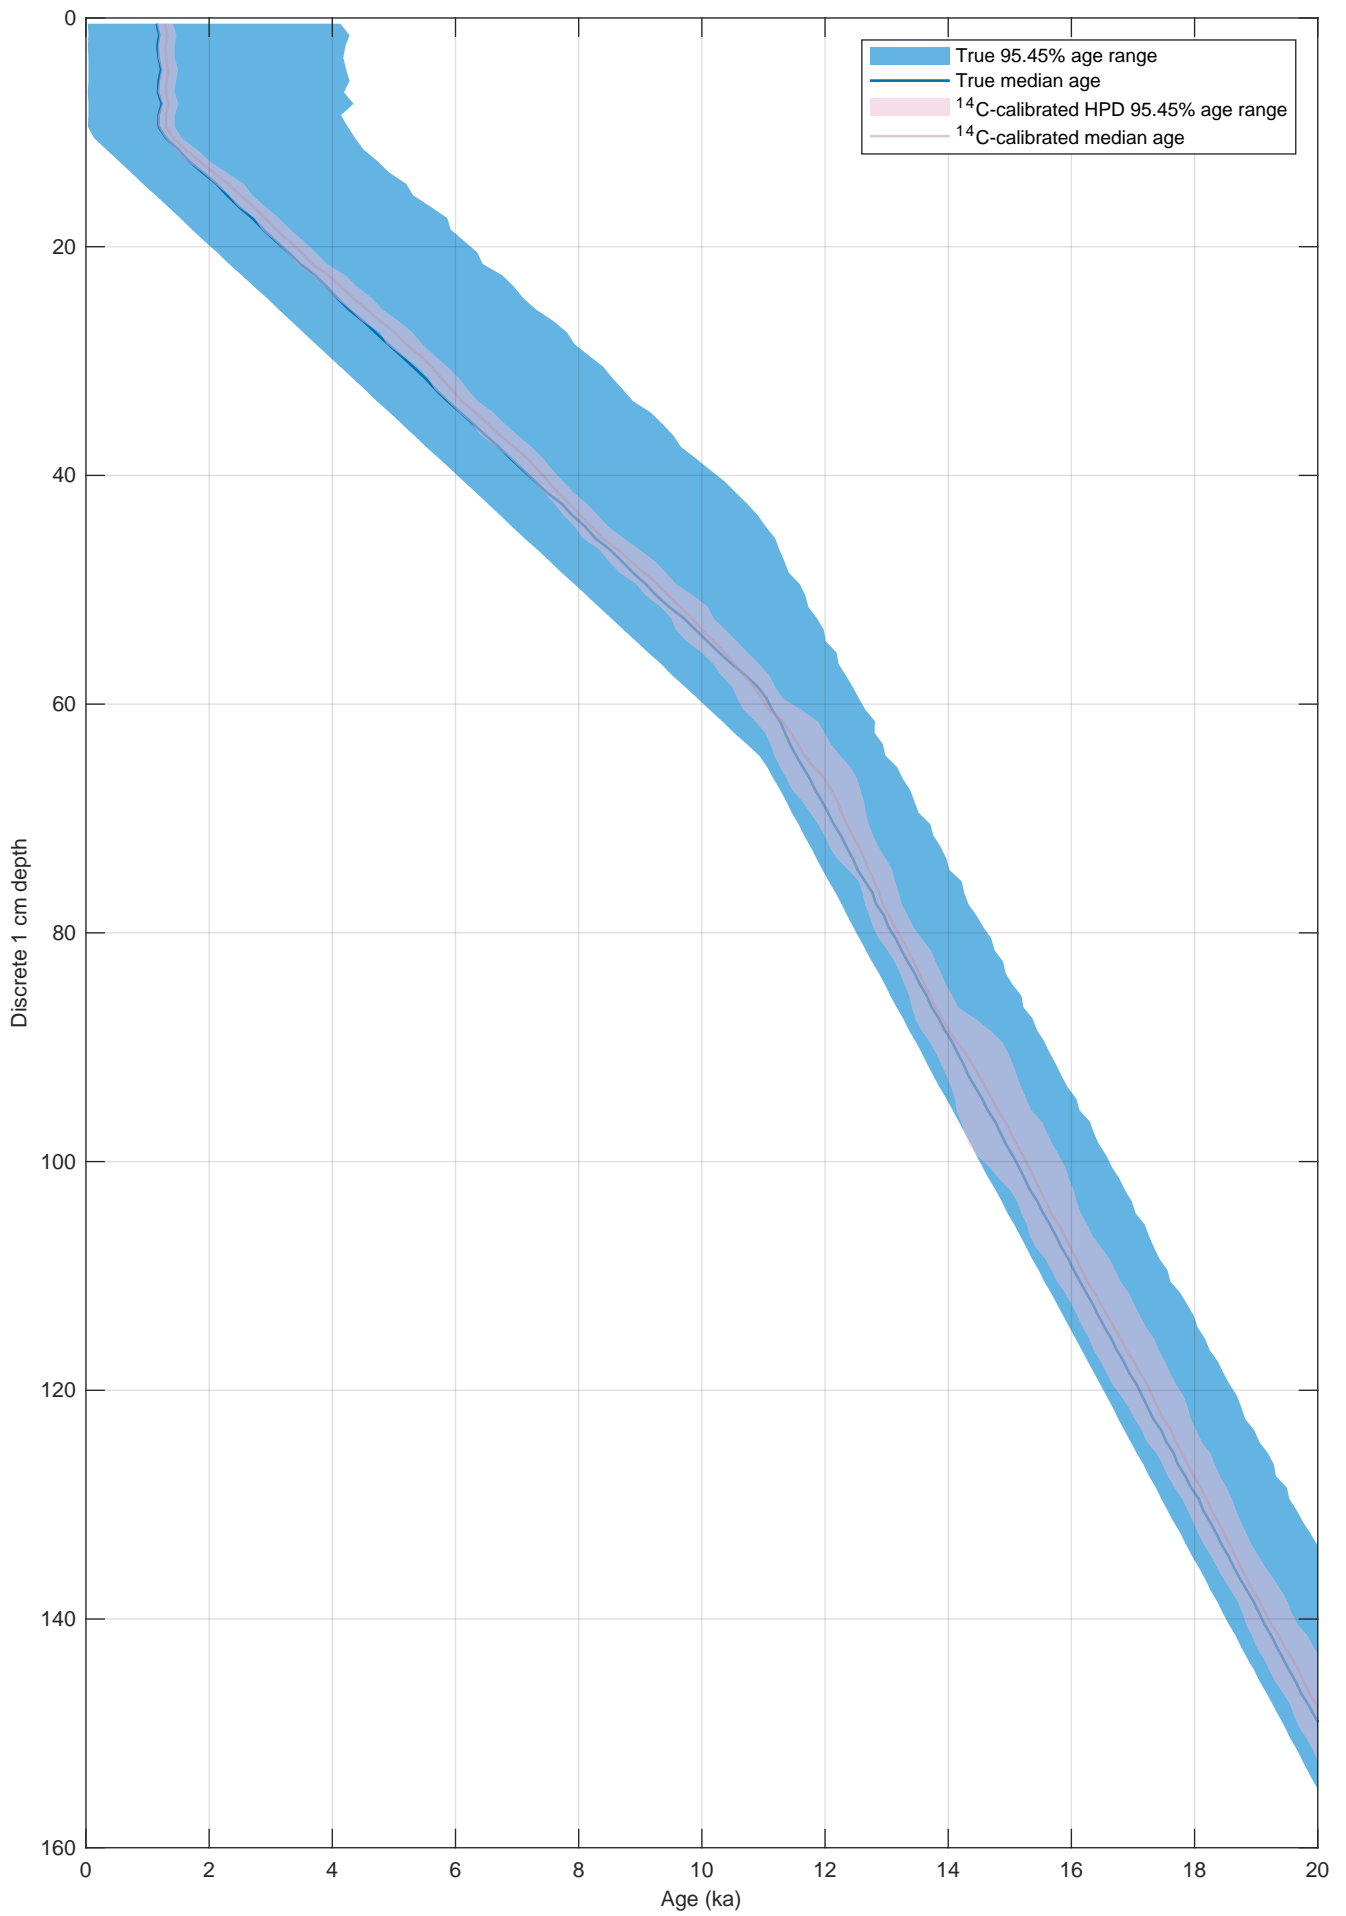

**Figure S11.** Simulated 1 cm discrete-depth 95.45% true age range (light blue), true median age (dark blue),  $^{14}\text{C}$ -calibrated 95.45% HPD age range (light pink) and  $^{14}\text{C}$ -calibrated median age (dark pink for whole foraminifera in a simulation scenario using the dynamic inputs detailed in Fig. 5a, 5b, 5c and 5d and 10% broken foraminifera.
